# Supplementary material for: Scaled polar surface area descriptors: development and application to three sets of partition coefficientsElectronic supplementary information (ESI) available: tables giving the coefficients and t-ratios of the models, the statistics for the test sets and the full data set and descriptors employed. See http://www.rsc.org/suppdata/nj/b3/b307023a/
Source: Royal Society of Chemistry journal article supplement (doi:10.1039/b307023a), 2004-01-01
Supplement: b307023a.pdf [file b307023a.pdf]

**Table S3** Full data set and descriptors employed

| Name                  | oct   | chcl  | cyc   | TSA    | ASA (scaled) | BSA (scaled) | PSA (scaled) | ASA (unscaled) |
|-----------------------|-------|-------|-------|--------|--------------|--------------|--------------|----------------|
| Acetamide             | -1.09 | -2.00 | -4.88 | 103.10 | 6.17         | 44.39        | 50.56        | 8.23           |
| Trimethylphosphate    | -0.52 | 0.76  | -2.22 | 183.69 | 0.00         | 81.23        | 81.23        | 0.00           |
| Nitromethane          | -0.35 | 0.44  | -0.93 | 97.02  | 0.00         | 20.50        | 20.50        | 0.00           |
| Acetonitrile          | -0.34 | 0.40  | -1.46 | 88.87  | 0.00         | 28.23        | 28.23        | 0.00           |
| Aceticacid            | -0.17 | -1.60 | -3.05 | 100.20 | 7.84         | 30.06        | 37.90        | 4.36           |
| Imidazole             | -0.08 | -0.83 | -3.70 | 106.85 | 2.57         | 44.10        | 46.67        | 4.08           |
| 1-Propanol            | 0.25  | -0.30 | -1.49 | 123.99 | 4.99         | 27.88        | 32.87        | 4.38           |
| t-Butanol             | 0.35  | -0.04 | -1.15 | 144.18 | 4.94         | 25.23        | 30.16        | 4.33           |
| Benzamide             | 0.64  | 0.11  | -1.92 | 166.82 | 5.31         | 41.02        | 46.33        | 7.09           |
| Pyrrole               | 0.75  | 0.91  | -0.36 | 118.09 | 0.00         | 34.49        | 34.49        | 0.00           |
| 2-Butanol             | 0.76  | 0.30  | -0.96 | 146.57 | 4.96         | 24.87        | 29.83        | 4.35           |
| Triethylphosphate     | 0.80  | 2.28  | -0.14 | 261.44 | 0.00         | 76.05        | 76.05        | 0.00           |
| Nitropropane          | 0.87  | 1.91  | 0.53  | 145.51 | 0.00         | 19.59        | 19.59        | 0.00           |
| Benzylamine           | 1.09  | 1.18  | -0.12 | 168.53 | 2.04         | 49.49        | 51.54        | 8.51           |
| 2-Methylpyridine      | 1.11  | 1.79  | 0.23  | 152.99 | 0.00         | 30.25        | 30.25        | 0.00           |
| Acetanilide           | 1.16  | 0.78  | -1.51 | 196.64 | 6.05         | 26.25        | 32.30        | 4.03           |
| 3-Methylpyridine      | 1.20  | 1.89  | 0.27  | 152.33 | 0.00         | 31.76        | 31.76        | 0.00           |
| 4-Methylpyridine      | 1.22  | 1.77  | 0.21  | 152.34 | 0.00         | 31.85        | 31.85        | 0.00           |
| o-Toluidine           | 1.32  | 1.96  | 0.61  | 166.96 | 2.71         | 21.68        | 24.39        | 7.54           |
| 4-Hydroxyacetophenone | 1.45  | 0.08  | -2.16 | 186.62 | 6.66         | 47.74        | 54.39        | 4.11           |
| Benzaldehyde          | 1.47  | 2.25  | 1.13  | 158.25 | 0.00         | 28.02        | 28.02        | 0.00           |
| Benzonitrile          | 1.56  | 2.71  | 1.11  | 157.26 | 0.00         | 28.24        | 28.24        | 0.00           |
| 4-Hydroxybenzoicacid  | 1.58  | -2.00 | -1.77 | 172.02 | 14.44        | 49.23        | 63.67        | 8.43           |
| Acetophenone          | 1.58  | 2.78  | 1.27  | 179.23 | 0.00         | 26.63        | 26.63        | 0.00           |
| 2-Hydroxybenzaldehyde | 1.81  | 2.43  | 1.37  | 164.05 | 0.61         | 21.74        | 22.35        | 4.06           |
| Nitrobenzene          | 1.85  | 2.93  | 1.69  | 161.73 | 0.00         | 18.84        | 18.84        | 0.00           |
| Tripropylphosphate    | 1.87  | 3.67  | 1.18  | 334.92 | 0.00         | 75.69        | 75.69        | 0.00           |
| Isoquinoline          | 2.08  | 3.07  | 1.11  | 179.93 | 0.00         | 31.70        | 31.70        | 0.00           |
| Methylbenzoate        | 2.12  | 3.01  | 2.08  | 193.44 | 0.00         | 24.09        | 24.09        | 0.00           |
| Indole                | 2.14  | 2.95  | 0.79  | 167.14 | 2.57         | 9.11         | 11.68        | 4.07           |
| 4-Ethylphenol         | 2.47  | 1.47  | 0.37  | 189.36 | 6.63         | 21.17        | 27.80        | 4.09           |
| 4-Bromophenol         | 2.59  | 1.07  | -0.09 | 166.09 | 6.65         | 21.14        | 27.79        | 4.10           |
| 1-Heptanol            | 2.72  | 2.41  | 1.12  | 220.03 | 4.99         | 27.89        | 32.88        | 4.38           |
| Chlorobenzene         | 2.89  | 3.37  | 3.13  | 154.09 | 0.00         | 0.00         | 0.00         | 0.00           |

|                      |       |       |       |        |      |       |       |      |
|----------------------|-------|-------|-------|--------|------|-------|-------|------|
| 4-Iodophenol         | 2.91  | 1.56  | 0.57  | 172.60 | 6.65 | 21.14 | 27.79 | 4.11 |
| Iodobenzene          | 3.25  | 3.70  | 3.54  | 165.20 | 0.00 | 0.00  | 0.00  | 0.00 |
| Naphthalene          | 3.30  | 4.18  | 3.50  | 185.69 | 0.00 | 0.00  | 0.00  | 0.00 |
| Biphenyl             | 4.01  | 4.67  | 4.16  | 221.43 | 0.00 | 0.00  | 0.00  | 0.00 |
| 2,4-Dimethylphenol   | 2.30  | 1.50  | 0.59  | 187.90 | 4.81 | 20.65 | 25.45 | 2.97 |
| 2,5-Dimethylphenol   | 2.33  | 1.59  | 0.57  | 187.99 | 4.80 | 20.63 | 25.44 | 2.96 |
| 2-Bromophenol        | 2.33  | 1.64  | 1.16  | 164.70 | 4.58 | 20.64 | 25.23 | 2.83 |
| 2-Fluorophenol       | 1.71  | 0.57  | -0.30 | 146.87 | 6.02 | 21.14 | 27.16 | 3.71 |
| 2-Hydroxybenzoicacid | 2.26  | 0.58  | -0.46 | 169.93 | 8.08 | 23.43 | 31.51 | 6.30 |
| 2-Iodophenol         | 2.65  | 1.97  | 1.26  | 171.02 | 4.23 | 20.56 | 24.79 | 2.61 |
| 2-Methylphenol       | 1.98  | 1.23  | -0.04 | 164.49 | 4.80 | 20.64 | 25.44 | 2.96 |
| 3,5-Dimethylphenol   | 2.35  | 1.60  | 0.38  | 189.13 | 6.60 | 21.16 | 27.76 | 4.07 |
| 3-Ethylphenol        | 2.50  | 1.41  | 0.36  | 189.36 | 6.60 | 21.17 | 27.76 | 4.07 |
| 3-Methylphenol       | 1.98  | 0.89  | -0.34 | 165.71 | 6.60 | 21.17 | 27.77 | 4.08 |
| 4-Methylphenol       | 1.97  | 1.06  | -0.35 | 165.72 | 6.62 | 21.17 | 27.80 | 4.09 |
| Butanoicacid         | 0.79  | -0.27 | -1.76 | 148.74 | 7.83 | 28.15 | 35.98 | 4.35 |
| Butylacetate         | 1.82  | 3.05  | 1.75  | 203.50 | 0.00 | 26.06 | 26.06 | 0.00 |
| Butylamine           | 0.97  | 0.78  | -0.29 | 150.91 | 2.04 | 52.66 | 54.70 | 8.51 |
| Diethylamine         | 0.58  | 0.76  | -0.34 | 158.20 | 1.03 | 36.13 | 37.16 | 4.28 |
| Ethylamine           | -0.13 | -0.35 | -1.80 | 103.11 | 2.04 | 52.85 | 54.89 | 8.51 |
| Methylhexanoate      | 2.42  | 3.48  | 2.39  | 225.64 | 0.00 | 24.22 | 24.22 | 0.00 |
| Methylpentanoate     | 1.87  | 3.01  | 1.81  | 201.65 | 0.00 | 24.22 | 24.22 | 0.00 |
| Methylpropanoate     | 0.76  | 1.87  | 0.57  | 153.59 | 0.00 | 24.40 | 24.40 | 0.00 |
| Propanone.mol        | -0.24 | 0.50  | -0.96 | 116.95 | 0.00 | 29.24 | 29.24 | 0.00 |
| Butanone.mol         | 0.29  | 1.15  | -0.25 | 140.80 | 0.00 | 26.91 | 26.91 | 0.00 |
| Methanol.mol         | -0.77 | -1.33 | -2.49 | 73.58  | 5.00 | 29.52 | 34.52 | 4.39 |
| Ethanol.mol          | -0.31 | -0.87 | -1.89 | 99.77  | 4.99 | 28.02 | 33.01 | 4.38 |
| Butan-1-ol.mol       | 0.84  | 0.42  | -0.87 | 146.32 | 4.87 | 24.75 | 29.62 | 4.27 |
| pentanol.mol         | 1.56  | 1.05  | -0.26 | 172.03 | 4.99 | 27.89 | 32.88 | 4.38 |
| Benzoicacid.mol      | 1.87  | 0.60  | -0.85 | 164.66 | 7.79 | 28.14 | 35.93 | 4.33 |
| Phenol.mol           | 1.47  | 0.32  | -0.93 | 142.27 | 6.62 | 21.16 | 27.78 | 4.09 |
| m-Chlorophenol.mol   | 2.50  | 1.02  | -0.12 | 161.49 | 6.63 | 21.14 | 27.77 | 4.09 |
| p-Chlorophenol.mol   | 2.39  | 1.07  | -0.35 | 161.52 | 6.64 | 21.15 | 27.79 | 4.10 |
| triethylamine.mol    | 1.44  | 1.86  | 1.10  | 199.60 | 0.00 | 35.14 | 35.14 | 0.00 |
| Propylamine.mol      | 0.47  | 0.25  | -0.98 | 126.93 | 2.04 | 52.66 | 54.70 | 8.51 |
| Pentanoicacid.mol    | 1.39  | 0.32  | -1.10 | 172.74 | 7.83 | 28.17 | 36.00 | 4.35 |

|                      |      |       |       |        |       |        |        |       |
|----------------------|------|-------|-------|--------|-------|--------|--------|-------|
| p-Toluidine.mol      | 1.39 | 1.95  | 0.56  | 168.92 | 3.03  | 23.04  | 26.07  | 8.41  |
| Ethylacetate.mol     | 0.73 | 1.82  | 0.34  | 155.11 | 0.00  | 26.05  | 26.05  | 0.00  |
| Aniline.mol          | 0.90 | 1.35  | 0.05  | 145.43 | 3.03  | 23.03  | 26.06  | 8.41  |
| Resorcinol.mol       | 0.80 | -1.34 | -3.79 | 149.68 | 13.25 | 42.28  | 55.52  | 8.18  |
| o-Nitroaniline.mol   | 1.85 | 1.83  | 0.36  | 169.55 | 2.21  | 33.41  | 35.62  | 6.54  |
| m-Nitroaniline.mol   | 1.37 | 1.60  | -0.42 | 172.14 | 3.02  | 41.79  | 44.80  | 8.39  |
| p-Nitroaniline.mol   | 1.39 | 1.26  | -1.00 | 172.07 | 2.99  | 41.75  | 44.74  | 8.30  |
| Methylacetate.mol    | 0.18 | 1.16  | -0.19 | 129.17 | 0.00  | 26.20  | 26.20  | 0.00  |
| Pyridine.mol         | 0.65 | 1.29  | -0.31 | 128.62 | 0.00  | 31.81  | 31.81  | 0.00  |
| 2-Nitrophenol.mol    | 1.85 | 2.53  | 1.45  | 167.10 | 0.31  | 29.44  | 29.75  | 2.09  |
| 3-Nitrophenol.mol    | 2.00 | 0.50  | -0.51 | 167.10 | 0.31  | 29.44  | 29.75  | 2.09  |
| 4-Nitrophenol.mol    | 1.91 | 0.20  | -2.05 | 169.07 | 6.68  | 39.91  | 46.58  | 4.12  |
| o-Methoxyphenol.mol  | 1.32 | 1.70  | 0.47  | 174.82 | 2.48  | 27.32  | 29.79  | 3.30  |
| Benzene.mol          | 2.13 | 2.76  | 2.35  | 134.83 | 0.00  | 0.00   | 0.00   | 0.00  |
| Toluene.mol          | 2.73 | 3.41  | 2.99  | 158.28 | 0.00  | 0.00   | 0.00   | 0.00  |
| hexanol.mol          | 2.03 | 1.69  | 0.45  | 196.04 | 4.99  | 27.89  | 32.88  | 4.38  |
| Diethylether.mol     | 0.89 | 1.88  | 0.93  | 154.89 | 0.00  | 17.23  | 17.23  | 0.00  |
| 2-Naphthol.mol       | 2.70 | 1.74  | 0.29  | 193.08 | 6.70  | 21.06  | 27.76  | 4.13  |
| Phenylaceticacid.mol | 1.00 | 0.57  | -1.23 | 192.25 | 7.82  | 29.19  | 37.01  | 4.34  |
| atropine.mol         | 1.83 | 2.44  | -1.02 | 372.70 | 5.00  | 90.42  | 95.42  | 4.38  |
| Aspirin.mol          | 0.90 | 0.63  | -2.00 | 224.44 | 7.78  | 51.94  | 59.72  | 4.32  |
| nicotine.mol         | 1.17 | 1.89  | 0.36  | 242.92 | 0.00  | 63.22  | 63.22  | 0.00  |
| 1-Naphthylamine.mol  | 2.25 | 2.60  | 1.26  | 194.24 | 2.64  | 21.73  | 24.36  | 7.32  |
| 1-Naphthol.mol       | 2.84 | 1.50  | 0.58  | 191.54 | 3.95  | 20.81  | 24.76  | 2.44  |
| Ephedrine.mol        | 1.13 | 1.10  | -0.44 | 244.87 | 4.64  | 50.17  | 54.81  | 7.46  |
| o-Chlorophenol.mol   | 2.15 | 1.36  | 0.87  | 160.21 | 4.61  | 20.69  | 25.30  | 2.84  |
| Quinine.mol          | 3.47 | 2.29  | 0.04  | 393.19 | 4.34  | 123.61 | 127.95 | 3.81  |
| Propranolol          | 3.48 | 1.03  | -0.64 | 355.15 | 5.83  | 72.22  | 78.05  | 8.05  |
| Tetracaine           | 3.51 | 2.90  | 2.05  | 391.74 | 1.50  | 78.65  | 80.14  | 4.16  |
| Papaverine           | 2.95 | 4.28  | 2.56  | 417.10 | 0.00  | 94.45  | 94.45  | 0.00  |
| Tryptamine           | 2.15 | 1.53  | -0.60 | 226.44 | 4.61  | 61.68  | 66.29  | 12.59 |
| Diclofenac           | 4.51 | 2.97  | 1.88  | 323.01 | 8.49  | 35.48  | 43.97  | 6.14  |
| Chlorpromazine       | 5.40 | 6.21  | 5.24  | 376.42 | 0.00  | 71.61  | 71.61  | 0.00  |
| Ibuprofen            | 3.97 | 3.03  | 1.88  | 298.29 | 7.84  | 25.65  | 33.49  | 4.36  |
| Lidocaine            | 2.44 | 4.08  | 1.23  | 340.30 | 5.09  | 54.53  | 59.62  | 3.39  |
| Deprenyl             | 2.90 | 4.29  | 2.81  | 284.83 | 3.39  | 23.61  | 27.01  | 0.00  |

|             |      |      |       |        |      |       |       |      |
|-------------|------|------|-------|--------|------|-------|-------|------|
| Desipramine | 4.21 | 5.33 | 3.38  | 359.54 | 1.03 | 41.22 | 42.24 | 4.27 |
| Fluoxetine  | 3.75 | 5.48 | 3.62  | 383.09 | 1.03 | 49.48 | 50.50 | 4.28 |
| Procaine    | 2.14 | 2.13 | -0.13 | 337.98 | 3.01 | 80.79 | 83.80 | 8.36 |
| Miconazole  | 5.34 | 5.42 | 4.69  | 438.78 | 0.00 | 45.61 | 45.61 | 0.00 |

| BSA (unscaled) | PSA (unscaled) | BenSA | HalSA | Predicted oct | Predicted chl | Predicted cyc |
|----------------|----------------|-------|-------|---------------|---------------|---------------|
| 41.57          | 49.79          | 0.00  | 0.00  | -0.26         | -1.36         | -3.11         |
| 46.93          | 46.93          | 0.00  | 0.00  | -0.37         | 0.16          | -2.13         |
| 50.69          | 50.69          | 0.00  | 0.00  | 0.27          | 0.98          | -0.25         |
| 25.44          | 25.44          | 0.00  | 0.00  | -0.08         | 0.52          | -0.87         |
| 41.74          | 46.09          | 0.00  | 0.00  | 0.16          | -1.25         | -2.75         |
| 27.82          | 31.90          | 23.74 | 0.00  | 0.01          | -0.25         | -1.97         |
| 19.36          | 23.74          | 0.00  | 0.00  | 0.50          | -0.03         | -1.44         |
| 17.52          | 21.85          | 0.00  | 0.00  | 0.86          | 0.46          | -0.87         |
| 38.70          | 45.78          | 52.29 | 0.00  | 1.30          | 0.50          | -1.16         |
| 15.33          | 15.33          | 38.16 | 0.00  | 0.57          | 1.06          | -0.45         |
| 17.27          | 21.62          | 0.00  | 0.00  | 0.90          | 0.51          | -0.81         |
| 45.17          | 45.17          | 0.00  | 0.00  | 0.86          | 1.80          | -0.31         |
| 48.67          | 48.67          | 0.00  | 0.00  | 0.96          | 1.91          | 0.74          |
| 18.33          | 26.84          | 51.50 | 0.00  | 1.00          | 0.99          | -0.79         |
| 13.44          | 13.44          | 44.87 | 0.00  | 1.25          | 1.92          | 0.52          |
| 26.25          | 30.28          | 53.00 | 0.00  | 2.17          | 1.47          | 0.11          |
| 14.11          | 14.11          | 44.39 | 0.00  | 1.19          | 1.84          | 0.41          |
| 14.16          | 14.16          | 44.34 | 0.00  | 1.19          | 1.84          | 0.41          |
| 18.06          | 25.60          | 49.17 | 0.00  | 1.80          | 1.89          | 0.63          |
| 39.27          | 43.38          | 49.19 | 0.00  | 1.36          | 0.25          | -1.53         |
| 20.76          | 20.76          | 52.43 | 0.00  | 1.48          | 2.15          | 0.80          |
| 25.44          | 25.44          | 52.27 | 0.00  | 1.46          | 2.13          | 0.76          |
| 57.68          | 66.11          | 49.77 | 0.00  | 1.26          | -1.96         | -3.88         |
| 19.73          | 19.73          | 51.78 | 0.00  | 1.80          | 2.59          | 1.28          |
| 37.95          | 42.01          | 50.28 | 0.00  | 1.73          | 2.35          | 1.11          |
| 47.14          | 47.14          | 53.23 | 0.00  | 1.81          | 2.59          | 1.41          |
| 44.95          | 44.95          | 0.00  | 0.00  | 1.88          | 3.17          | 1.14          |
| 14.09          | 14.09          | 78.34 | 0.00  | 1.96          | 2.58          | 1.15          |
| 27.03          | 27.03          | 52.35 | 0.00  | 2.08          | 2.96          | 1.71          |
| 12.15          | 16.22          | 73.22 | 0.00  | 2.45          | 2.59          | 1.54          |
| 19.61          | 23.70          | 47.77 | 0.00  | 2.18          | 1.36          | 0.09          |
| 19.58          | 23.68          | 49.09 | 43.64 | 2.16          | 0.86          | -0.14         |
| 19.37          | 23.74          | 0.00  | 0.00  | 1.82          | 1.74          | 0.44          |
| 0.00           | 0.00           | 51.58 | 39.15 | 2.52          | 3.12          | 2.55          |

|       |       |        |       |       |       |       |
|-------|-------|--------|-------|-------|-------|-------|
| 19.58 | 23.68 | 48.54  | 51.16 | 2.30  | 0.97  | 0.02  |
| 0.00  | 0.00  | 51.14  | 51.19 | 2.74  | 3.30  | 2.83  |
| 0.00  | 0.00  | 85.95  | 0.00  | 3.08  | 4.00  | 3.17  |
| 0.00  | 0.00  | 100.82 | 0.00  | 3.74  | 4.76  | 3.95  |
| 19.12 | 22.09 | 44.94  | 0.00  | 2.11  | 1.78  | 0.54  |
| 19.11 | 22.07 | 44.85  | 0.00  | 2.11  | 1.78  | 0.54  |
| 19.12 | 21.94 | 49.49  | 42.67 | 2.12  | 1.36  | 0.39  |
| 19.58 | 23.29 | 52.74  | 19.28 | 1.77  | 0.73  | -0.46 |
| 55.89 | 62.19 | 50.04  | 0.00  | 1.89  | 0.57  | -0.78 |
| 19.04 | 21.65 | 48.98  | 50.13 | 2.25  | 1.55  | 0.64  |
| 19.11 | 22.07 | 49.76  | 0.00  | 1.84  | 1.38  | 0.11  |
| 19.59 | 23.66 | 44.53  | 0.00  | 2.14  | 1.34  | 0.07  |
| 19.60 | 23.67 | 47.75  | 0.00  | 2.18  | 1.37  | 0.10  |
| 19.60 | 23.67 | 49.40  | 0.00  | 1.87  | 0.94  | -0.36 |
| 19.61 | 23.69 | 49.40  | 0.00  | 1.87  | 0.94  | -0.36 |
| 40.22 | 44.57 | 0.00   | 0.00  | 0.88  | -0.27 | -1.69 |
| 29.46 | 29.46 | 0.00   | 0.00  | 1.56  | 2.72  | 1.49  |
| 19.50 | 28.02 | 0.00   | 0.00  | 0.08  | 0.19  | -1.62 |
| 10.04 | 14.32 | 0.00   | 0.00  | 0.65  | 1.23  | -0.24 |
| 19.57 | 28.08 | 0.00   | 0.00  | -0.59 | -0.70 | -2.56 |
| 29.16 | 29.16 | 0.00   | 0.00  | 1.92  | 3.20  | 2.03  |
| 29.17 | 29.17 | 0.00   | 0.00  | 1.59  | 2.76  | 1.57  |
| 29.29 | 29.29 | 0.00   | 0.00  | 0.93  | 1.87  | 0.62  |
| 21.66 | 21.66 | 0.00   | 0.00  | 0.28  | 1.00  | -0.38 |
| 19.94 | 19.94 | 0.00   | 0.00  | 0.67  | 1.53  | 0.22  |
| 20.50 | 24.89 | 0.00   | 0.00  | -0.24 | -1.03 | -2.52 |
| 19.46 | 23.83 | 0.00   | 0.00  | 0.17  | -0.48 | -1.92 |
| 17.19 | 21.46 | 0.00   | 0.00  | 0.90  | 0.54  | -0.78 |
| 19.37 | 23.74 | 0.00   | 0.00  | 1.16  | 0.86  | -0.50 |
| 38.15 | 42.48 | 52.36  | 0.00  | 1.70  | 0.37  | -1.07 |
| 19.60 | 23.68 | 54.24  | 0.00  | 1.60  | 0.54  | -0.79 |
| 19.57 | 23.67 | 48.98  | 39.12 | 2.07  | 0.79  | -0.25 |
| 19.58 | 23.68 | 48.99  | 39.13 | 2.07  | 0.79  | -0.25 |
| 3.91  | 3.91  | 0.00   | 0.00  | 1.24  | 2.29  | 0.88  |
| 19.50 | 28.01 | 0.00   | 0.00  | -0.25 | -0.25 | -2.08 |
| 40.22 | 44.57 | 0.00   | 0.00  | 1.21  | 0.17  | -1.23 |

|       |       |        |       |      |       |       |
|-------|-------|--------|-------|------|-------|-------|
| 19.20 | 27.62 | 48.51  | 0.00  | 1.79 | 1.79  | 0.50  |
| 29.54 | 29.54 | 0.00   | 0.00  | 0.90 | 1.83  | 0.55  |
| 19.19 | 27.60 | 53.38  | 0.00  | 1.52 | 1.39  | 0.07  |
| 39.15 | 47.32 | 51.65  | 0.00  | 1.16 | -1.79 | -3.59 |
| 63.41 | 69.95 | 50.25  | 0.00  | 1.49 | 1.60  | 0.12  |
| 66.22 | 74.61 | 49.83  | 0.00  | 1.28 | 1.11  | -0.53 |
| 66.22 | 74.53 | 49.73  | 0.00  | 1.28 | 1.12  | -0.52 |
| 30.74 | 30.74 | 0.00   | 0.00  | 0.54 | 1.34  | 0.04  |
| 14.14 | 14.14 | 49.43  | 0.00  | 0.93 | 1.44  | -0.02 |
| 64.61 | 66.70 | 50.98  | 0.00  | 1.55 | 2.17  | 0.80  |
| 64.61 | 66.70 | 50.98  | 0.00  | 1.55 | 2.17  | 0.80  |
| 66.61 | 70.74 | 50.64  | 0.00  | 1.37 | 0.25  | -1.41 |
| 29.97 | 33.27 | 50.34  | 0.00  | 1.75 | 1.87  | 0.52  |
| 0.00  | 0.00  | 56.84  | 0.00  | 2.05 | 2.87  | 2.01  |
| 0.00  | 0.00  | 51.99  | 0.00  | 2.32 | 3.27  | 2.44  |
| 19.37 | 23.74 | 0.00   | 0.00  | 1.49 | 1.30  | -0.03 |
| 10.44 | 10.44 | 0.00   | 0.00  | 1.16 | 2.18  | 1.07  |
| 19.50 | 23.63 | 83.39  | 0.00  | 2.64 | 1.65  | 0.35  |
| 40.86 | 45.21 | 50.49  | 0.00  | 2.03 | 0.82  | -0.62 |
| 43.29 | 47.67 | 48.71  | 0.00  | 2.60 | 2.39  | 0.01  |
| 63.56 | 67.88 | 47.62  | 0.00  | 1.75 | 0.50  | -1.33 |
| 17.61 | 17.61 | 41.13  | 0.00  | 1.46 | 2.24  | 0.31  |
| 18.11 | 25.43 | 82.76  | 0.00  | 2.56 | 2.63  | 1.37  |
| 19.27 | 21.71 | 46.33  | 0.00  | 2.15 | 2.06  | 0.83  |
| 24.35 | 31.81 | 49.46  | 0.00  | 2.05 | 1.72  | -0.02 |
| 19.16 | 22.00 | 49.36  | 38.15 | 2.03 | 1.28  | 0.27  |
| 46.59 | 50.39 | 64.60  | 0.00  | 2.05 | 1.71  | -1.28 |
| 35.02 | 43.07 | 82.07  | 0.00  | 3.30 | 2.81  | 0.72  |
| 39.78 | 43.94 | 47.65  | 0.00  | 3.14 | 4.05  | 1.96  |
| 53.08 | 53.08 | 105.92 | 0.00  | 3.65 | 4.64  | 2.24  |
| 31.61 | 44.20 | 65.12  | 0.00  | 1.63 | 1.03  | -0.96 |
| 43.48 | 49.63 | 86.03  | 72.58 | 4.54 | 2.93  | 1.96  |
| 8.12  | 8.12  | 87.78  | 39.01 | 3.83 | 4.61  | 2.89  |
| 37.91 | 42.27 | 40.36  | 0.00  | 3.48 | 2.85  | 1.60  |
| 26.56 | 29.96 | 43.77  | 0.00  | 3.18 | 3.16  | 1.44  |
| 2.62  | 2.62  | 49.52  | 0.00  | 3.38 | 3.82  | 2.64  |

|       |       |        |        |      |      |      |
|-------|-------|--------|--------|------|------|------|
| 12.87 | 17.15 | 89.14  | 0.00   | 4.29 | 5.34 | 3.89 |
| 17.27 | 21.55 | 96.14  | 55.53  | 4.81 | 5.39 | 4.19 |
| 48.41 | 56.77 | 48.85  | 0.00   | 2.38 | 2.61 | 0.41 |
| 21.00 | 21.00 | 102.52 | 148.71 | 6.37 | 6.71 | 6.27 |
